# Supplementary material for: Genetic analysis of sinonasal undifferentiated carcinoma discovers recurrent SWI/SNF alterations and a novel PGAP3-SRPK1 fusion gene
Source: PubMed Central journal article supplement (PMC8164750; doi:10.1186/s12885-021-08370-x), 2021-05-29
Supplement: 12885_2021_8370_MOESM3_ESM.pdf [file 12885_2021_8370_MOESM3_ESM.pdf]

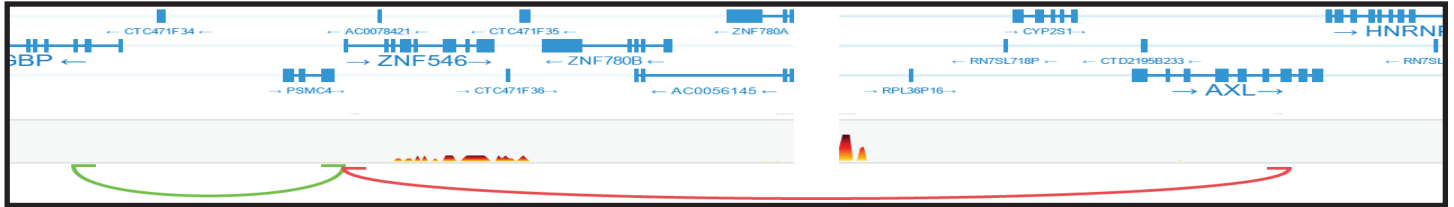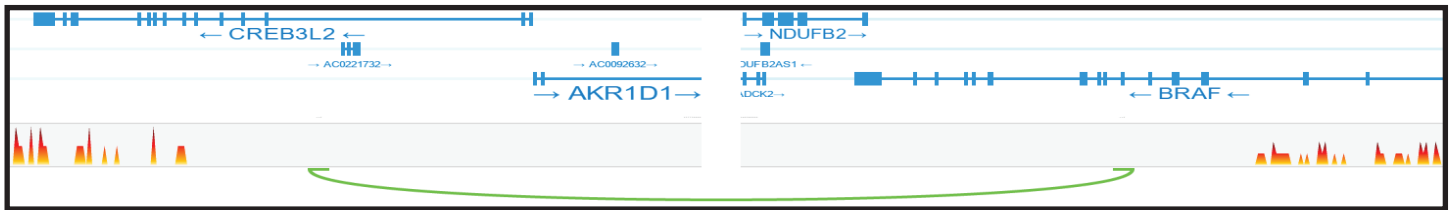

**Supplemental Figure 3:** Linked read genome sequencing identifies structural variations in the MDA8788-6 genome involving ZNF546 and AXL as well as CREB3L2 and BRAF.
