# Supplementary material for: Genetic analysis of sinonasal undifferentiated carcinoma discovers recurrent SWI/SNF alterations and a novel PGAP3-SRPK1 fusion gene
Source: Springer Nature journal article supplement (doi:10.1186/s12885-021-08370-x), 2021-05-29
Supplement: MOESM2 [file 19209414]

**Supplemental Figure 2: Predicted protein structure of PGAP3-SRPK1 fusion gene including predicted active site (Ref 37,38).**

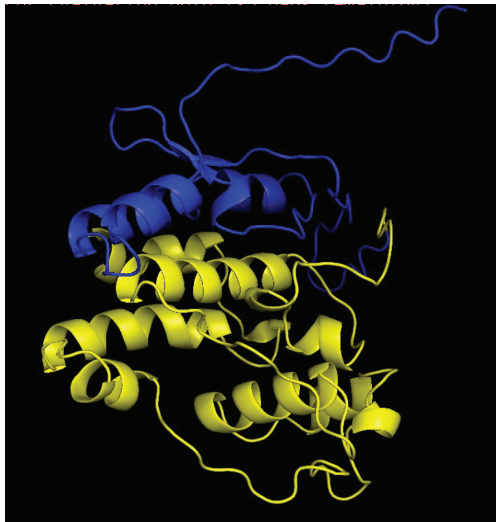

**PGAP**  
**SRPK-1**

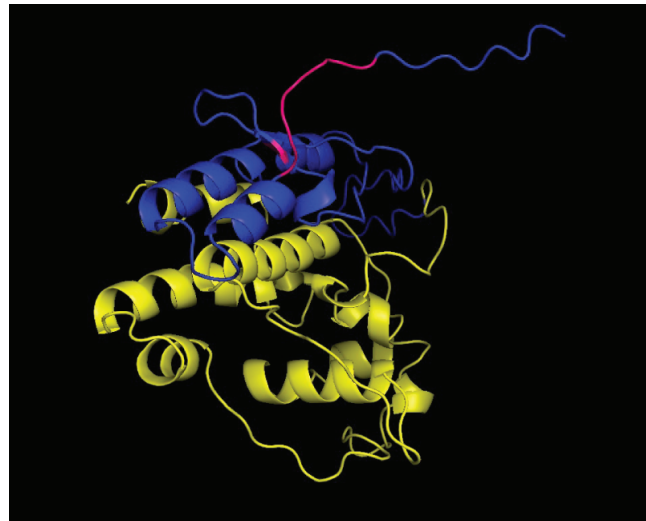

**PGAP**  
**SRPK-1**  
**Predicted Binding Site**

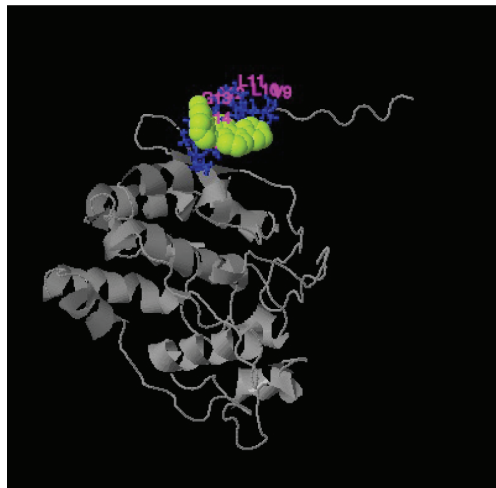

**Predicted Binding Pattern**

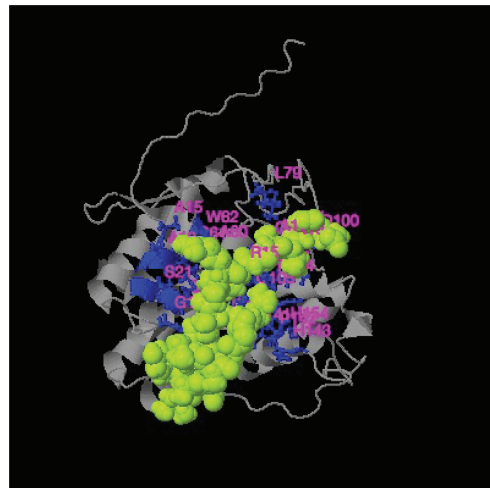

**Alternative Predicted Binding Site**

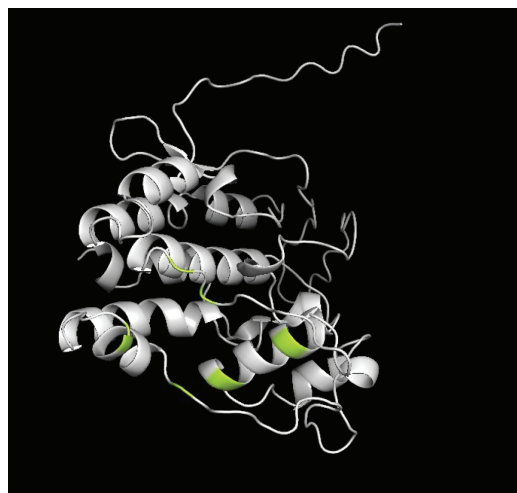

**SRPK-1 Active Binding Site**
